# Supplementary material for: Mono- and di-nuclear nickel(ii) complexes derived from NNO donor ligands: syntheses, crystal structures and magnetic studies of dinuclear analogues
Source: Royal Society of Chemistry journal article supplement (doi:10.1039/c6ra02982e), 2016-01-01
Supplement: c6ra02982e1.pdf [file c6ra02982e1.pdf]

## Supplementary Information

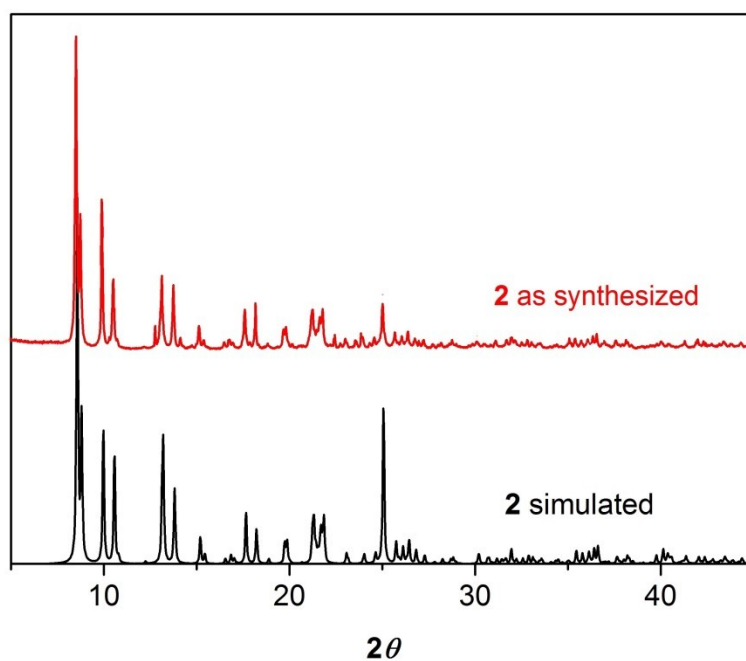

**Fig.S1.** Powder X-ray diffraction patterns of **2** (red) compared with the simulation (black) obtained from single crystal data of **2**.

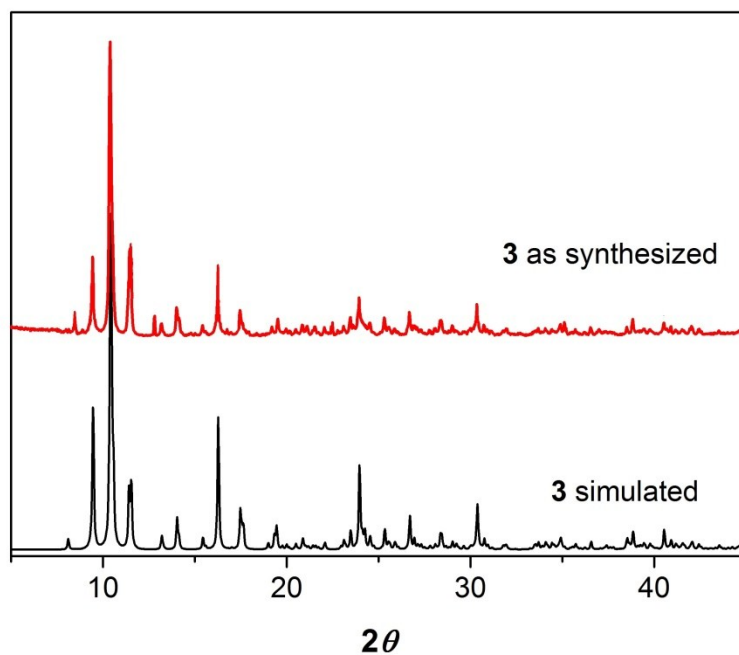

**Fig. S2.** Powder X-ray diffraction patterns of **3** (red) compared with the simulation (black) obtained from single crystal data of **3**.

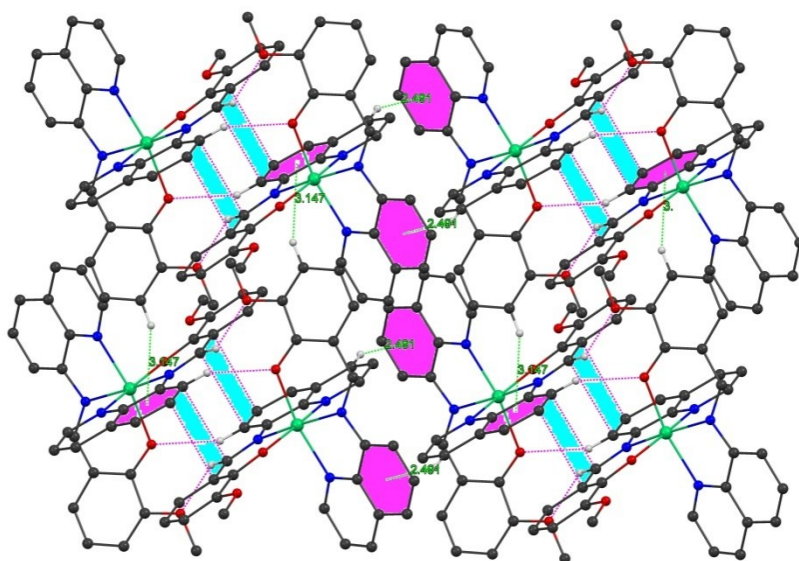

**Fig. S3.** Packing diagram of complex 1

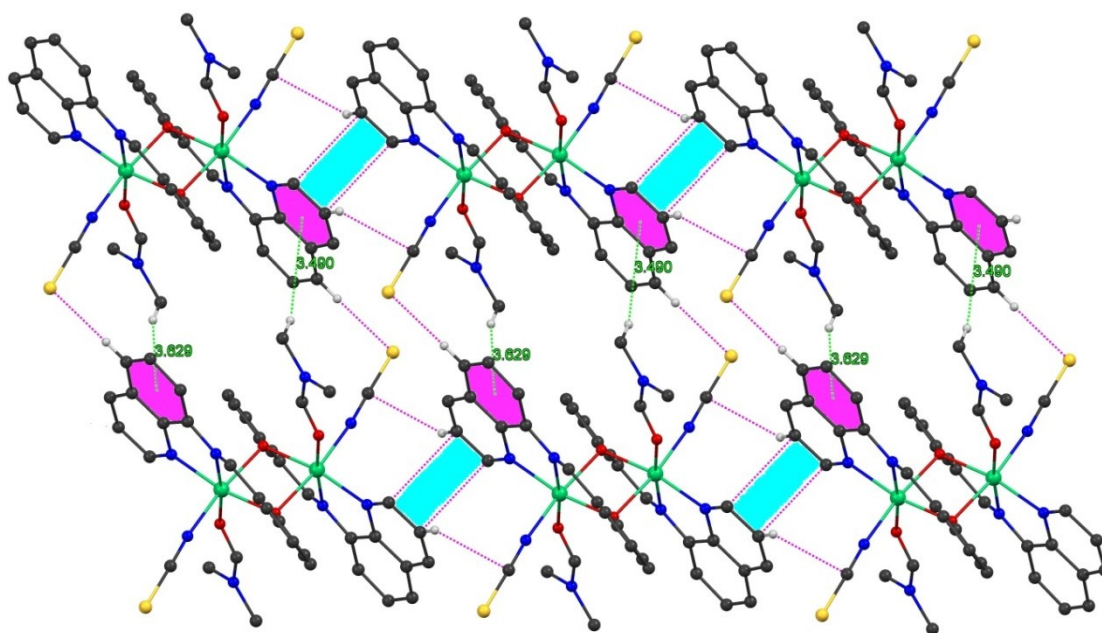

**Fig. S4.** Packing diagram of complex 2

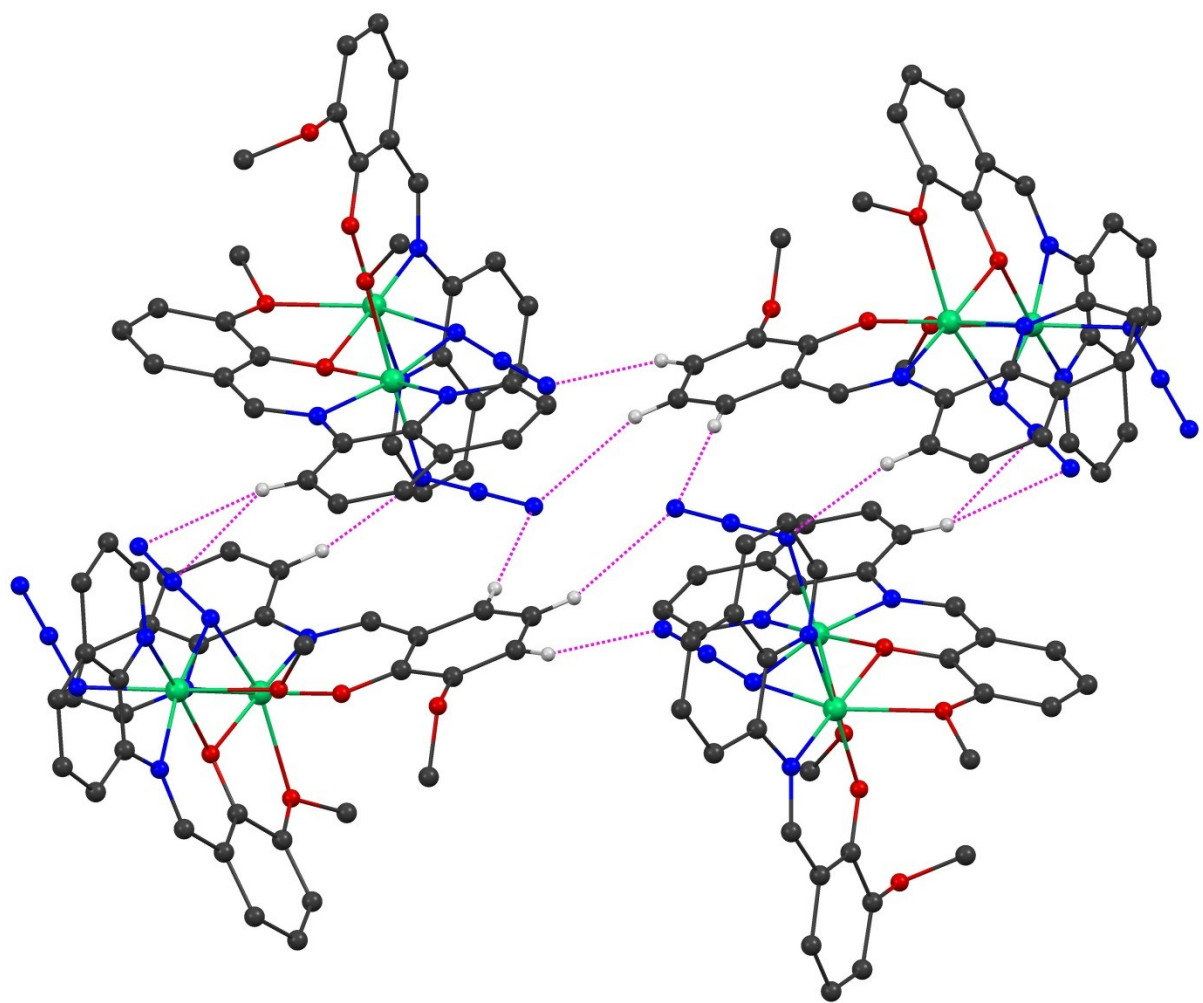

**Fig. S5.** Packing diagram of complex **3**

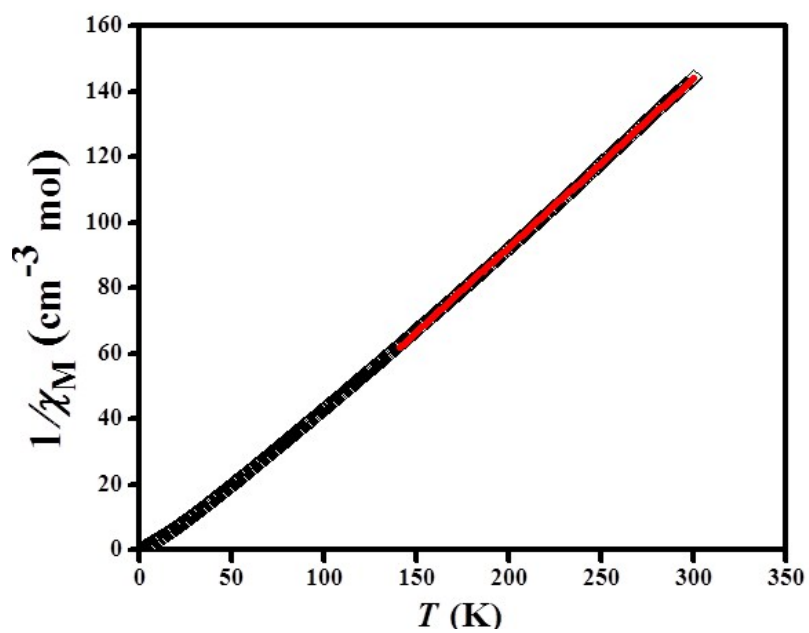

**Fig. S6:** Reciprocal molar susceptibility as function of temperature for **2**; solid red line indicates Curie-Weiss fitting in the range 140 K–300 K.

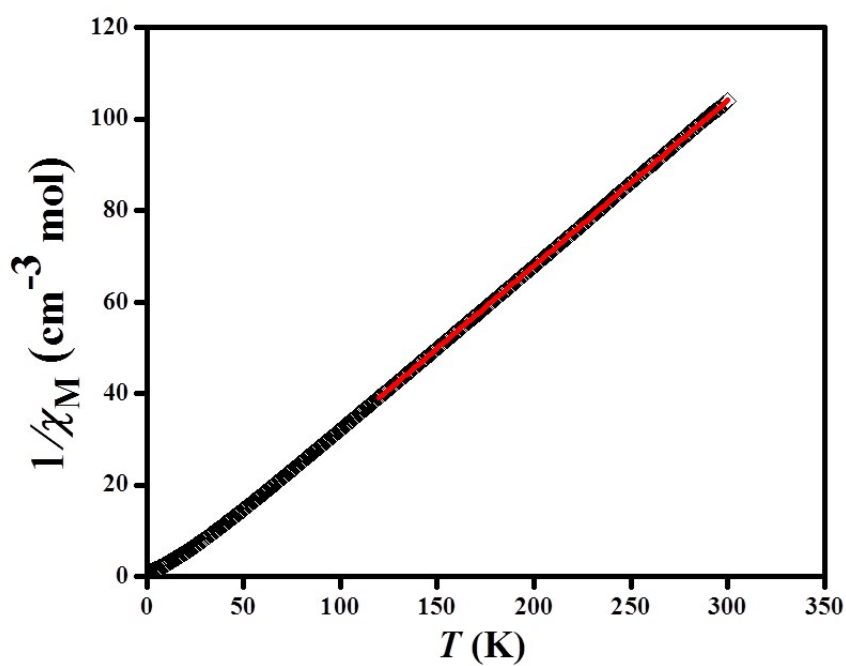

**Fig. S7:** Reciprocal molar susceptibility as function of temperature for **3**; solid red line indicates Curie-Weiss fitting in the range 120 K–300 K.
